# Supplementary material for: The microRNA bantam regulates a developmental transition in epithelial cells that restricts sensory dendrite growth
Source: Oxford University Press journal article supplement (doi:10.1242/dev.107573), 2014-06-13
Supplement: dev107573_supp.pdf [file dev107573_supp.pdf]

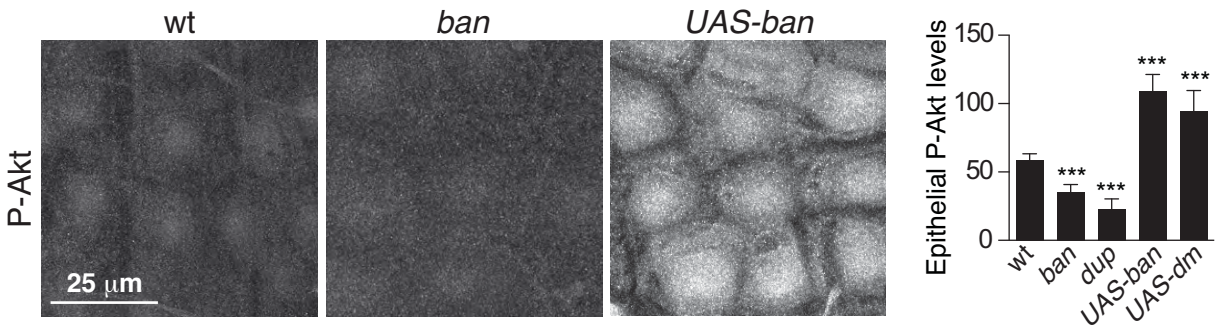

**Figure S1.** Phospho-Akt levels are responsive to *ban* activity and to endoreplication. Representative images of P-Akt staining in body wall epithelial cells of wild-type (wt), *ban* mutant, or epithelial *ban* overexpressing larvae are shown. Mean pixel intensity values for P-Akt staining.  $n \geq 50$  cells for each genotype. Error bars represent standard deviation. \*\*\* $P < 0.001$  compared to wt; one way ANOVA with a post-hoc Dunnett's test.

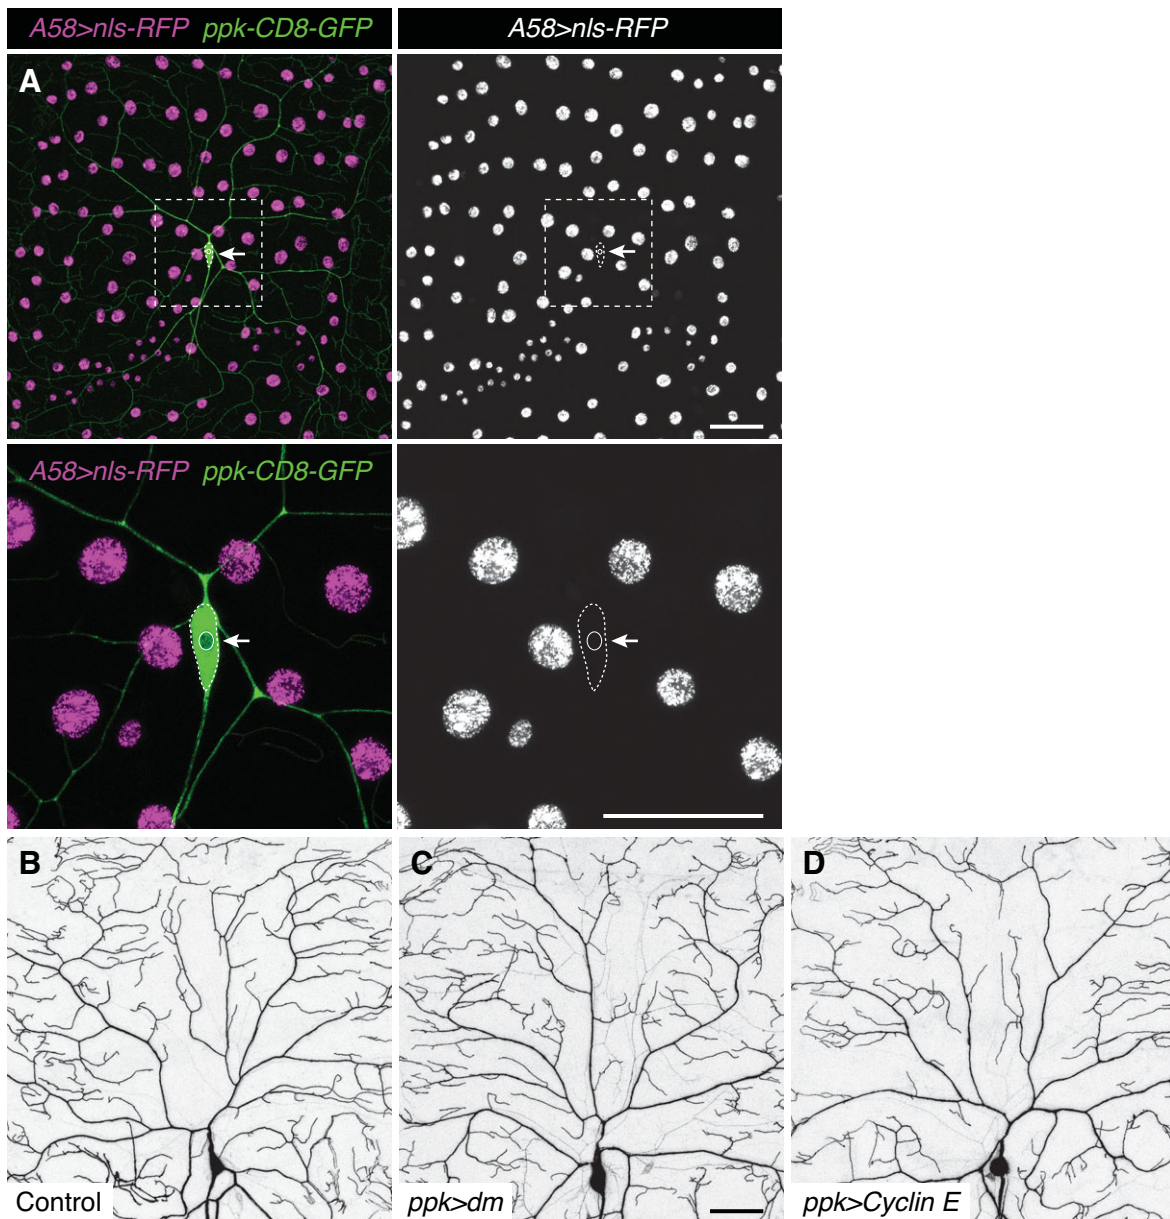

**Figure S2.** Epithelial specificity of *A58-Gal4* driver. (A) Larval *A58-Gal4* expression visualized by *UAS-nls-redStinger*. Although *A58-Gal4* is expressed throughout the epidermis, with the exception of apodemes, expression is not detectable in C4da neurons (arrow; labeled by *ppk-CD8-GFP*). (B-D) C4da dendrites in Control (*ppk-CD8-GFP*, *ppk-gal4* x *w<sup>118</sup>*) larvae (B) or larvae overexpressing *UAS-dm* (C) or *UAS-Cyclin-E* in C4da neurons. Neuronal overexpression of endoreplication regulators does not alter C4da growth/patterning, demonstrating that dendrite growth defects caused by *A58*-driven expression of *UAS-dm* and *UAS-Cyclin-E* are not due to leaky neuronal expression of the driver. Scale bars, 50  $\mu$ m.

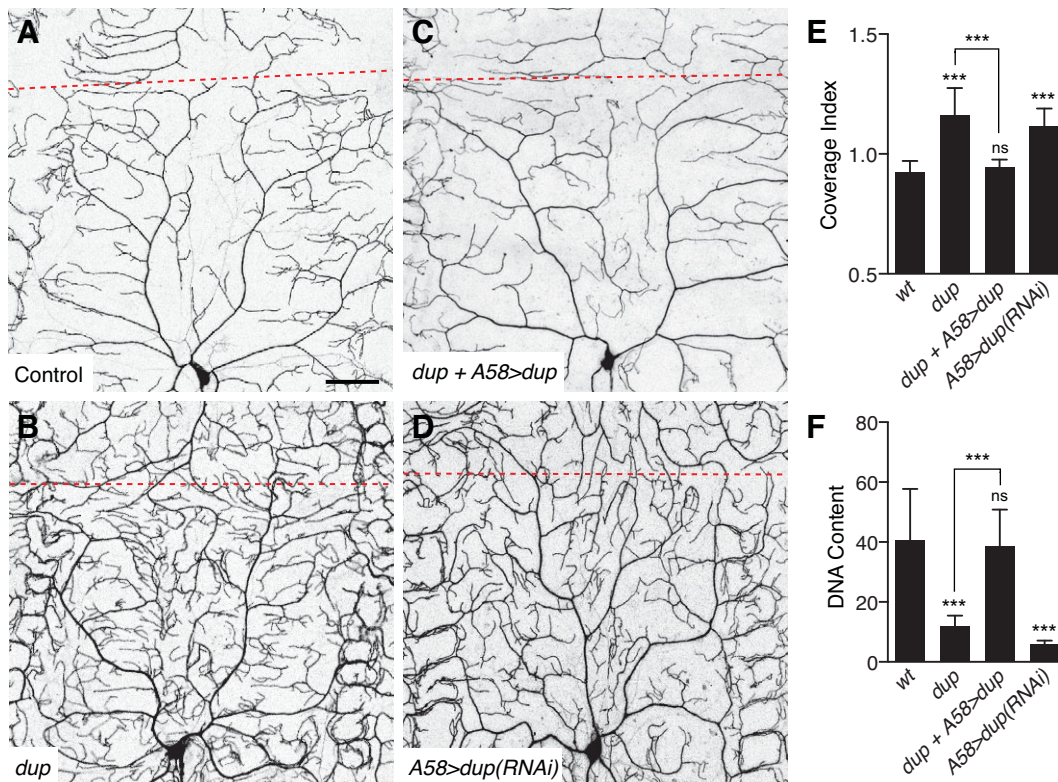

**Figure S3.** *dup* is required in epithelial cells to regulate epithelial ploidy and C4da dendrite growth. Compared to wt (A), blocking endoreplication with mutation in *dup* (B) increased dendrite growth and coverage. This dendrite overgrowth phenotype was completely rescued by resupplying *UAS-dup* to epithelial cells of homozygous *dup* mutant larvae (C). Epithelia-specific knockdown of *dup* (*A58>dupRNAi*) (D) caused dendrite defects comparable to *dup* mutation, demonstrating that *dup* is required in epithelial cells to support dendrite growth. (E) Quantification of dendrite coverage defects in the indicated genotypes.  $n=8$  dendrites for each genotype. (F) *dup* is required in epithelial cells to support epithelial endoreplication. Quantification of DNA content in epithelial cells of the indicated genotype; measurements were as indicated in Fig. 2.  $n>20$  cells for each genotype. Error bars represent standard deviation. \* $P<0.05$ , \*\* $P<0.01$ , \*\*\* $P<0.001$ ; ns, not significant; one-way ANOVA with a post-hoc Dunnett's test. Red dashed lines mark dorsal midline. Scale bars, 50  $\mu\text{m}$ . Images in (A) and (B) are reproduced from Fig. 3.

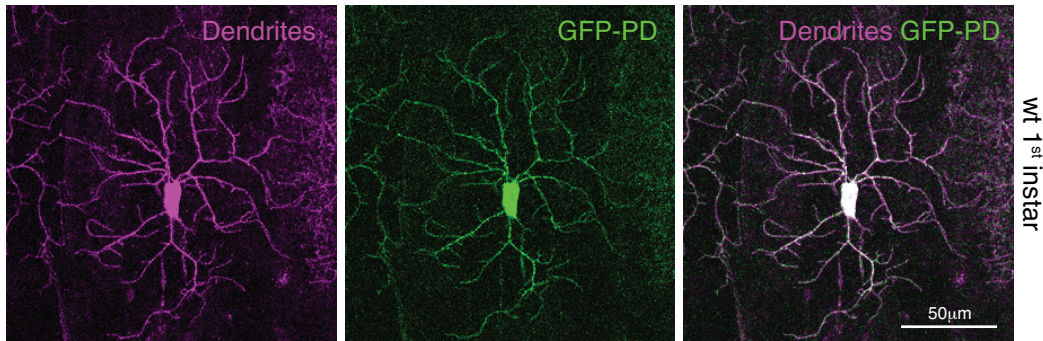

**Figure S4.** GFP-PD activity in first instar larvae. Both halves of the proximity detector were expressed in C4da neurons (*ppk-gal4>UAS-sp1-10GFP + ppk-sp11GFP*) and GFP-PD activity was monitored in newly eclosed first instar larvae. Imaging settings were identical to those used in Figure 4.

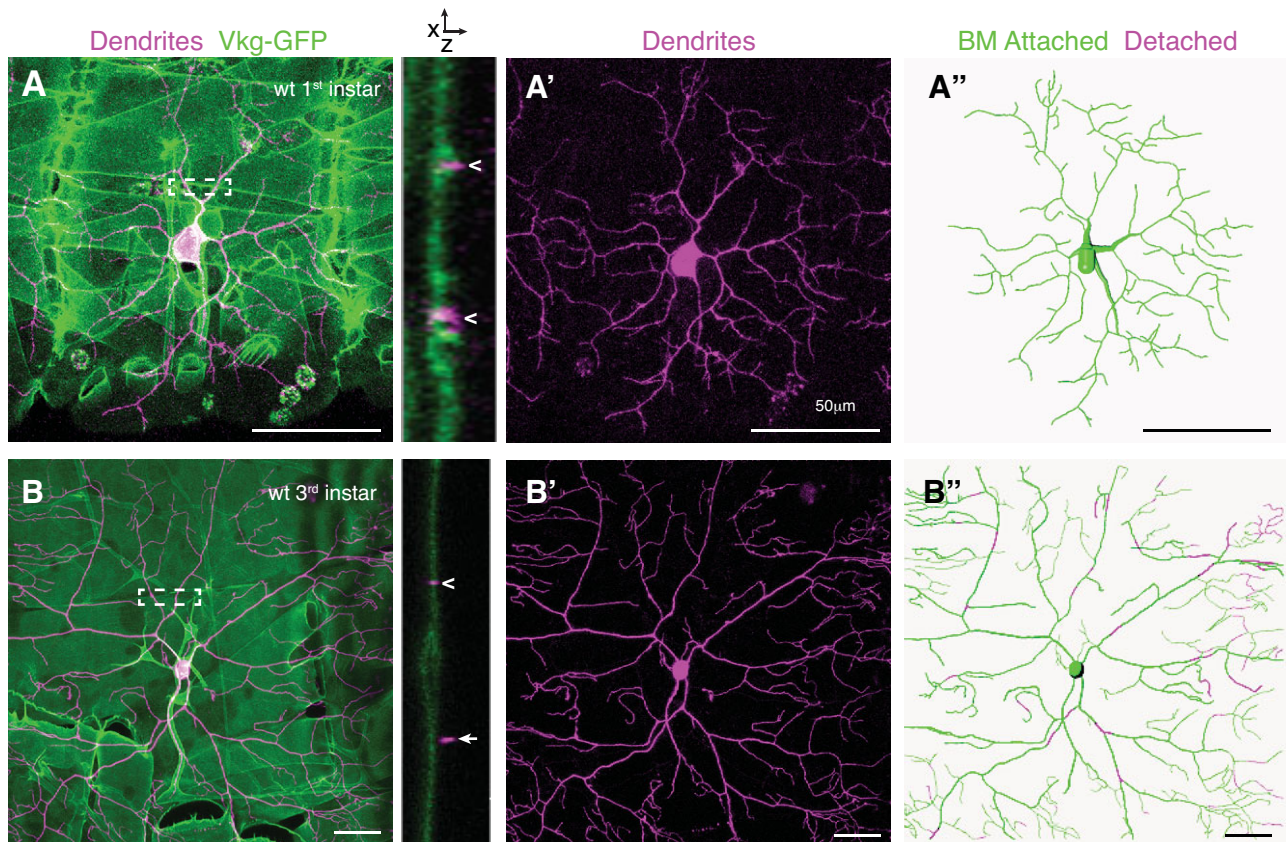

**Figure S5.** Live imaging of dendrites and the ECM using a neuronally-expressed membrane marker (*ppk-CD4-tdTomato*) and a GFP enhancer trap in *Drosophila viking* (*vkg-GFP*) to monitor dendrite-ECM colocalization. Representative maximum projections of 3D stacks captured by taking 200 nm optical sections are shown for wild type first instar larvae (A) and wild type third instar larvae (B). Orthogonal slices are shown for the region marked by a white dashed box, and in the orthogonal slice attached dendrites are marked with carats (>) and detached dendrites are marked with asterisks (\*). In the traces, dendrites that colocalize with Vkg-GFP are colored green whereas detached dendrites are colored magenta. Note the increase in dendrite detachment from the basement membrane in third instar larvae.

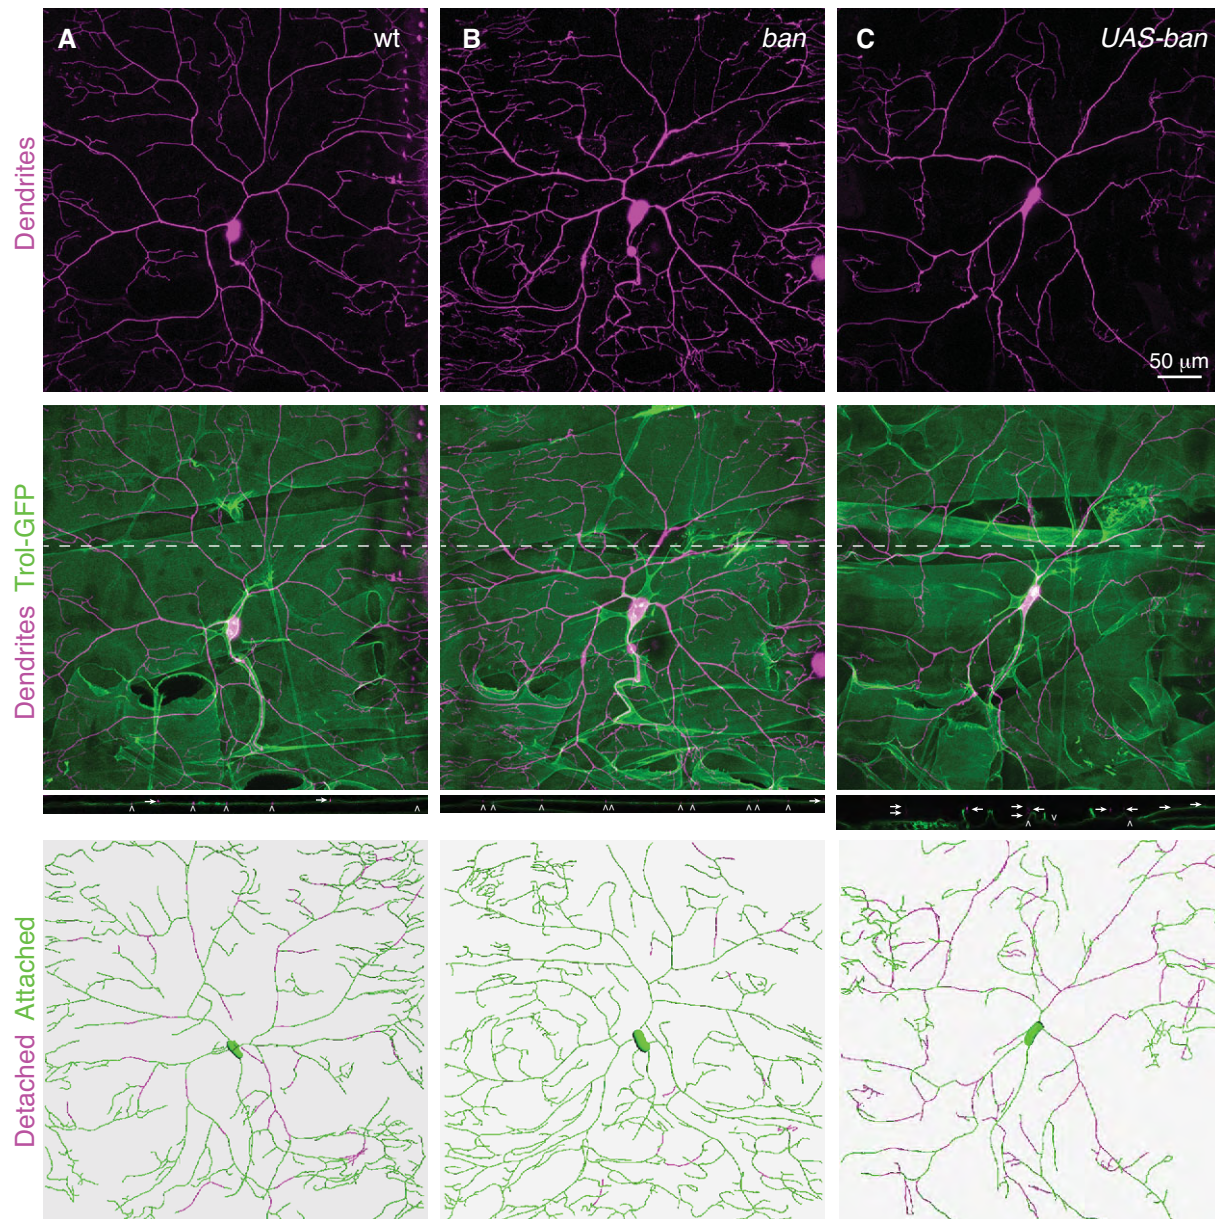

**Figure S6.** Live imaging of dendrites and the ECM using a neuronally-expressed membrane marker (*ppk-CD4-tdTomato*) and a GFP enhancer trap in the gene encoding *Drosophila* Perlecan (*trol-GFP*) to monitor dendrite-ECM colocalization in WT third instar larvae (A), *ban* mutant third instar larvae (B), and epithelial *ban* over-expressing instar larvae (C). 3D stacks were captured by taking 200 nm optical sections; maximum projections are shown. Following deconvolution, colocalization was measured between dendrites and Perlecan. Detached dendrites are marked with arrows in cross section and colored magenta in dendrite traces, whereas attached dendrites are marked with carets in cross section and colored green in dendrite traces.

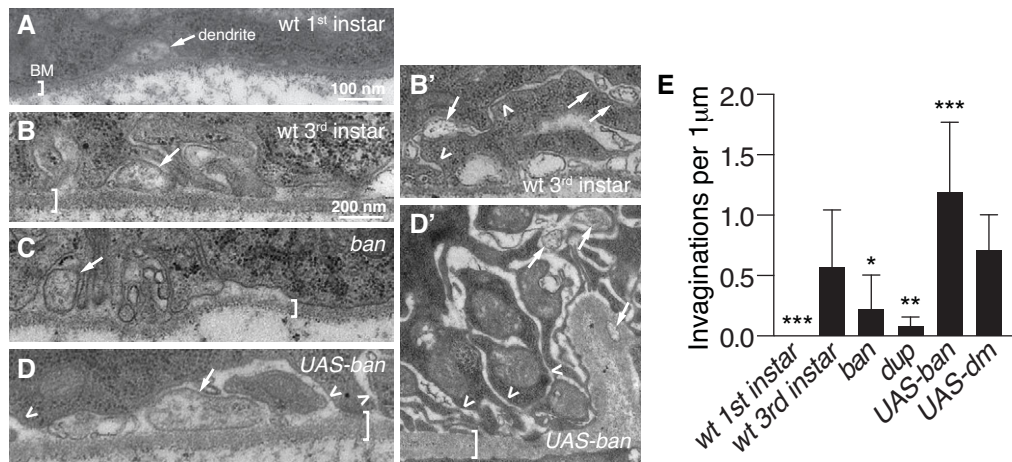

**Figure S7.** *ban* regulates epithelial internalization of dendrites. (A-D) TEM micrographs of the indicated genotypes. Dendrites (arrows) were identified as processes containing arrays of multiple parallel microtubules near the basal epithelial surface. Brackets mark BM; scale is identical in (B-D). (E) Epithelial basal plasma membrane invagination frequency was scored in 15 images (from multiple larvae) and the mean frequency of invaginations is plotted for the indicated genotypes. Other than wt first instar samples, all samples were from third instar larvae. Error bars represent standard deviation. \* $P < 0.05$ , \*\* $P < 0.01$ , \*\*\* $P < 0.001$  compared to wt 3<sup>rd</sup> instar; one way ANOVA with a post-hoc Dunnett's test.

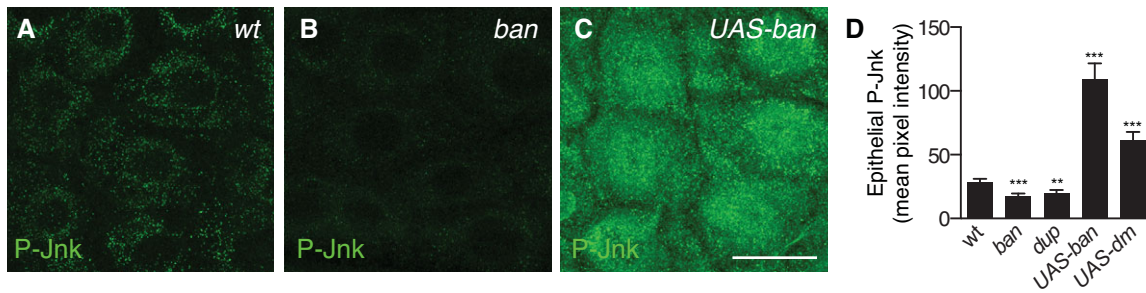

**Figure S8.** P-Jnk immunoreactivity in body wall epithelial cells is developmentally regulated by endoreplication. Representative images of P-Jnk staining in third instar body walls of wild-type (A), *ban* mutant (B), and epithelial *ban* overexpressing (C) larvae are shown. (D) Quantification of P-Jnk immunoreactivity for the indicated genotypes. Fillets of all genotypes were stained together with wild type fillets to ensure that staining conditions were comparable and all images were captured using identical settings. Means represent average pixel intensity of polygons outlining  $n > 50$  single cells (ImageJ). Error bars represent standard deviation. \*\* $P < 0.01$ , \*\*\* $P < 0.001$ ; one way ANOVA compared to wild type with a post-hoc Dunnett's test. Scale bar, 25  $\mu\text{m}$ .

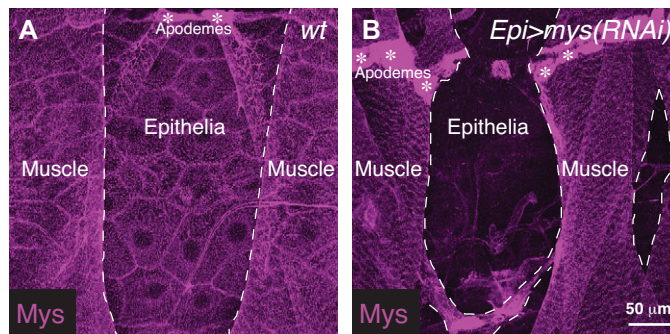

**Figure S9.** RNAi-mediated knockdown of epithelial Mys expression. Representative images of body wall Mys expression for wild type (A) and epithelial *mys(RNAi)* (B) are shown. Dashed white lines outline longitudinal muscles and asterisks mark apodemes. Note that epithelial *mys(RNAi)* effectively attenuates Mys levels in epithelial cells, but not muscle cells or apodemes, demonstrating the specificity of the Gal4 driver.



Table S1. ban-regulated transcripts in epithelial cells.

|         |         | Up-regulated in 3rd instar <i>ban</i> mutant larvae |                     |                     |                     |                     |                     |               |               |
|---------|---------|-----------------------------------------------------|---------------------|---------------------|---------------------|---------------------|---------------------|---------------|---------------|
| UNIQID  | NAME    | Fold Change                                         | wild type (0013-b1) | wild type (0013-b2) | wild type (0013-b3) | wild type (0020-b1) | wild type (0020-b2) | ban (0020-b3) | ban (0020-b4) |
| ft01431 | CG14957 | 54.38309826                                         | -0.926              | -0.386              | -1.305              | -1.655              | -1.224              | 4.91          | 4.527         |
| ft02983 | mtrm    | 41.38135366                                         | 0.45                | 0                   | -0.518              |                     | 0.018               | 4.87          | 5.697         |
| fc31822 | mTerf3  | 19.77716515                                         | 0.024               | 0                   | -0.198              | -0.505              | -0.831              | 3.817         | 4.231         |
| fc31821 | mTerf3  | 23.59403922                                         | 0.447               | 0.255               | 0.111               | -1.784              | -0.868              | 4.124         | 4.632         |
| fc24392 | Bem46   | 13.61779775                                         | 0.1655              | 0.0425              | -0.2765             | -0.2585             | -1.2325             | 3.7425        | 3.2785        |
| fc24391 | Bem46   | 11.22019386                                         | 0.072               | -0.127              | -0.659              | -0.122              | -0.928              | 3.364         | 2.974         |
| fc25516 | CG8397  | 7.832427306                                         | -0.8235             | -0.7635             | -0.7965             | -0.4815             | -0.6355             | 2.4775        | 2.0395        |
| fc13695 | CG14957 | 10.28335014                                         | -0.805              | -0.502              | -0.958              | 0.192               | 0.038               | 3.276         | 2.725         |
| ft09425 | CG40002 | 13.98774469                                         | -0.3715             | -0.8865             | -2.0935             | -2.2515             | -2.4645             | 2.2875        | 2.5775        |
| fc00390 | Pimet   | 13.43206545                                         | 0.5865              | 0.2905              | -0.7045             |                     |                     | 3.3755        | 3.5795        |
| fc29246 | CG4570  | 9.002184093                                         | -1.439              | -1.888              | -1.077              |                     | -1.374              | 1.854         | 2.051         |
| ft08658 | SC35    | 8.064435428                                         | -0.304              | 0.228               | -0.384              | -0.534              | -0.688              | 2.94          | 2.438         |
| fc02453 | grp     | 10.59343156                                         | 0.295               | 0.504               | -1.001              | -0.445              | -1.148              | 3.173         | 3.222         |
| fc24731 | CG4594  | 10.68938941                                         | 0.554               | 0.419               | 0.326               | -0.259              | -0.875              | 2.972         | 3.946         |
| ft05917 | spn-E   | 10.22992091                                         | 0.4435              | -0.2835             | -0.1695             | -0.0365             | -0.7115             | 3.7355        | 2.5195        |
| fc13376 | CG4702  | 15.42497591                                         | -0.357              | 0.511               | -0.161              | -0.018              | -2.607              | 3.802         | 3.619         |
| fc12616 | PGRP-SA | 13.40199442                                         | -0.095              | 0.225               | 0.174               | -1.422              | -1.643              | 3.823         | 2.786         |
| fc12617 | PGRP-SA | 14.21845636                                         | 0                   | 0.296               | 0.207               | -1.593              | -1.786              | 3.933         | 2.906         |
| fc31682 | Ady43A  | 7.927964382                                         | -0.548              | -0.44               | 0.199               | -0.784              | -1.157              | 2.344         | 2.663         |
| fc30581 | Papst2  | 6.120105738                                         | -0.958              | -0.962              | -1.334              | -0.598              | -1.18               | 1.692         | 1.563         |

|         |                    | Down-regulated in 3rd instar <i>ban</i> mutant larvae |                     |                     |                     |                     |                     |               |               |
|---------|--------------------|-------------------------------------------------------|---------------------|---------------------|---------------------|---------------------|---------------------|---------------|---------------|
| UNIQID  | NAME               | Fold Change                                           | wild type (0013-b1) | wild type (0013-b2) | wild type (0013-b3) | wild type (0020-b1) | wild type (0020-b2) | ban (0020-b3) | ban (0020-b4) |
| ft08217 | Cyp4p2             | 0.012934911                                           | 4.111               | 3.925               | 4.629               | 4.643               | 5.013               | -2.037        | -1.52         |
| ft05145 | cad                | 0.016748094                                           | 2.6725              | 4.0835              | 2.6875              | 3.4785              | 4.0145              | -2.0575       | -2.8145       |
| fc21832 | CG4382             | 0.0195567644                                          | 3.533               | 2.71                | 3.859               | 2.337               | 3.938               | -1.954        | -2.673        |
| ft02746 | CG14130            | 0.037092008                                           | 3.021               | 2.863               | 2.479               | 2.035               | 2.344               | -2.942        | -1.657        |
| ft08080 | CG12325            | 0.034088995                                           | 2.843               | 2.712               | 2.752               | 1.678               | 3.465               | -1.83         | -2.381        |
| fc17436 | Abl                | 0.066212955                                           | 1.009               | 1.393               | 1.546               | 1.719               | 1.097               | -2.428        | -2.66         |
| fc03754 | CG33667            | 0.032248651                                           | -0.745              | 1.094               | 0.283               | 0.588               | 1.03                | -4.145        | -4.639        |
| fr00526 | snoRNA:Me285-C788b | 0.02076532                                            | 2.062               | 1.349               | 1.865               | 3.594               | 1.577               | -4.846        | -2.503        |
| fc17435 | Abl                | 0.062946773                                           | 0.819               | 1.318               | 1.381               | 1.607               | 0.848               | -2.492        | -3.095        |
| fc21833 | CG4382             | 0.013611545                                           | 4.582               | 3.77                | 5.095               | 1.825               | 4.022               | -1.432        | -2.967        |
| fc26302 | Sox102F            | 0.01082367                                            | 0.745               | 0.753               | 2.654               | 3.828               |                     | -3.251        | -5.008        |
| ft03571 | CG4644             | 0.090373967                                           | 0.73                | 0.937               | 0.827               | 0.697               | 0.537               | -2.442        | -3.055        |
| ft00305 | rap                | 0.07176139                                            | 0.329               | 0.45                | 0.656               | 0.427               | -0.186              | -3.028        | -4.018        |
| ft07227 | CG3409             | 0.078947074                                           | -0.551              | -0.173              | 0.019               | -0.855              | 0                   | -3.571        | -4.428        |
| ft04329 | CG8419             | 0.018947444                                           | 1.026               | 1.781               | 2.486               | -0.745              | -0.255              | -4.424        | -4.374        |
| ft08088 | CG30017            | 0.08883701                                            | 3.301               | 3.651               | 3.554               | 3.434               | 3                   | -0.997        | 0.466         |
| ft02758 | Grip163            | 0.042182724                                           | 1.9575              | 1.5485              | 1.4265              | 2.1055              | 3.6355              | -4.0385       | -1.3895       |
| ft08218 | Cyp4p1             | 0.012128943                                           | 2.518               | 1.866               | 0.923               | 2.887               | -1.642              | -4.187        | -4.748        |
| fc02315 | CG3397             | 0.070869465                                           | 2.526               | 3.11                | 2.71                | 1.763               | 1.513               | -1.176        | -1.608        |
| ft01633 | CG15196            | 0.04496275                                            | 0.7745              | 1.6845              | 1.3925              | 2.4505              | -0.1545             | -3.6475       | -2.5525       |
| fc14739 | Grip163            | 0.050937694                                           | 1.833               | 1.945               | 2.351               | 0.308               | 2.737               | -1.917        | -2.725        |
| ft04133 | Ucp4C              | 0.156783026                                           | 1.37                | 1.426               | 1.479               | 1.26                | 1.396               | -1.13         | -1.459        |
| fc06063 | hep                | 0.077451084                                           | 1.268               | 1.494               | 1.452               | 2.043               | 2.853               | -1.999        | -1.523        |
| ft07069 | CG31005            | 0.043455668                                           | 0.293               | 0.024               | -0.442              | 2.152               | 1.047               | -4.511        | -3.046        |
| fc06062 | hep                | 0.093728032                                           | 1.621               | 1.803               | 1.861               | 2.404               | 2.896               | -1.316        | -1.126        |
| ft09260 | CG15400            | 0.10277636                                            | -0.928              | 1.607               | -0.086              | -0.171              | -0.186              | -3.115        | -3.972        |
| ft05448 | Crc                | 0.039040173                                           | 3.605               | 3.46                | 3.55                | 3.614               | 0.928               | -2.454        | -0.778        |
| ft01119 | CG30421            | 0.049349053                                           | 0.933               | 1.166               | 0                   | 1.78                |                     | -3.507        | -3.43         |
| ft01748 | sno                | 0.024643295                                           | 0.959               | 1.732               | 1.353               |                     | -2.074              | -5.149        | -4.029        |
| fc03453 | CG17568            | 0.048481514                                           | -0.2445             |                     | -0.1635             | 1.0845              | -0.0005             | -4.1305       | -4.5625       |
| fc15527 | lr76a              | 0.027653221                                           | 2.7665              | 2.3435              | 3.9235              | 0.2465              | 1.1695              | -2.0825       | -3.3055       |
| fc27070 | CG9776             | 0.179058477                                           | 1.8765              | 1.9005              | 1.8515              | 1.9335              | 1.9335              | -0.4625       | -0.7555       |
| fc20820 | CG40244            | 0.010388539                                           | -0.245              | 0.177               | 0.202               | 1.497               | 4.35                | -4.062        | -4.334        |
| fc26243 | slim               | 0.098689757                                           | 0.1835              | -0.0245             | 1.0225              | 0.1945              | 1.1475              | -2.3515       | -3.3145       |
| fc18150 | sno                | 0.097995896                                           | 0.47                | 0.851               | 0.85                |                     | -0.242              | -3.055        | -2.853        |
| ft03261 | CG1529             | 0.035237435                                           | 1.7135              | 2.3955              | 2.7965              | 5.0575              | 2.7935              | -0.5035       | -3.6435       |
| ft08475 | CG31998            | 0.081798552                                           | 0.5825              | 1.7735              | 1.9395              |                     |                     | -1.9975       | -2.9125       |
| ft02607 | HGTX               | 0.027263781                                           | 1.67                | 3.241               | 1.161               | -0.055              | -0.431              | -2.906        | -4.4          |
| fc01267 | CG31469            | 0.014542143                                           | 0.503               | 0.13                | 0.145               |                     | 4.186               | -4.426        | -3.475        |
| fc20245 | CG12065            | 0.114974181                                           | 0.337               | 1.099               | 0.864               | 0.208               | 0                   | -2.197        | -3.043        |
| fc03789 | Tang06             | 0.070757702                                           | 1.771               | 2.01                | 2.479               | 3.337               | 3.339               | -3.844        | -0.199        |
| ft06583 | CG5794             | 0.111658002                                           | 2.114               |                     | 2.865               | 2.429               | 2.151               | -0.179        | -1.985        |
| ft04979 | kel                | 0.15798186                                            | 0.7005              | 0.6715              | 0.9025              | 0.9405              | 1.2995              | -1.8585       | -1.6325       |
| ft06594 | CG13631            | 0.099913702                                           | -0.487              | -0.168              | 0.05                | -0.05               | 1.076               | -2.758        | -3.635        |
| fc32525 | Cp7Fb              | 0.02045096                                            | -0.034              | 0.6                 | 1.659               |                     | 4.197               | -3.483        | -2.947        |
| ft02314 | CG3397             | 0.068410779                                           | 2.353               | 2.903               | 2.57                | 1.765               | 0.56                | -1.439        | -1.881        |
| ft08287 | Cyp4e2             | 0.055960448                                           | -0.719              | -0.043              | 0.931               | -0.362              | 1.852               | -3.5          | -3.509        |
| fc27069 | CG9776             | 0.176973115                                           | 1.59                | 1.639               | 1.558               | 1.885               | 1.873               | -0.611        | -0.977        |
| fc10722 | Obp57e             | 0.060088032                                           |                     | 1.798               | 1.02                |                     | -0.898              |               | -4.477        |
| fc05719 | Hsc70-2            | 0.021612465                                           | 2.27                | 2.771               | 3.261               | 4.677               |                     | -1.734        | -3.158        |
| fc16288 | CG5794             | 0.143580054                                           | 2.429               | 2.441               | 2.926               | 2.709               | 2.448               | 0.278         | -0.905        |
| ft07164 | CG17994            | 0.075834157                                           | 0.952               | 1.939               | 1.886               | 0.077               |                     | -1.452        | -3.818        |
| fc20244 | CG12065            | 0.129118399                                           | 0.2815              | 0.9795              | 0.7035              | -0.0275             | 0.0105              | -2.2185       | -2.8725       |
| ft03054 | RNaseX25           | 0.144217243                                           | 0.37                | 0.102               | 0.193               | 0.008               | 0.91                | -2.696        | -2.221        |
| ft06749 | scrib              | 0.108149673                                           | 3.768               | 4.256               | 4.214               | 4.325               | 4.581               | -1.11         | 1.871         |
| ft07931 | Sin3A              | 0.095839888                                           | 0.34                | -0.028              | -0.326              | 1.272               | 1.15                | -2.607        | -2.941        |
| ft00510 | mys                | 0.091910806                                           | 1.529               | 1.355               | 2.007               | 0.49                | 0.312               | -1.707        | -2.848        |
| fc05897 | plexA              | 0.046323452                                           | 1.92                | 2.064               | 1.055               | 2.489               | 4.288               | -1.355        | -1.937        |
| fc17672 | tkv                | 0.135622406                                           | 1.352               | 1.716               | 1.122               | 1.876               | 1.518               | -0.813        | -2.184        |
| ft03099 | CG8596             | 0.095171726                                           | 0.723               | 0.713               | 1.99                | 2.243               | 1.793               | -1.521        | -2.058        |
| fc03755 | CG33667            | 0.061472178                                           | -0.966              | 0.252               | 0.155               | -1.629              | 1.034               | -3.895        | -4.051        |
| fc31265 | Imp                | 0.123685737                                           | 1.056               | 2.007               | 1.506               | 2.126               | 2.323               | -0.825        | -1.551        |
| fc09500 | S1P                | 0.08517687                                            | 0.793               | 0.688               | 1.277               | 1.474               | 2.708               | -1.718        | -2.253        |
| fc32371 | ssp3               | 0.168561006                                           | 1.025               | 1.241               | 1.094               | 1.359               | 0.906               | -1.098        | -1.875        |
| fc28724 | CG13875            | 0.083270432                                           | 1.4655              | 1.2545              | 1.3285              | 3.1805              | 2.0055              | -3.0655       | -0.8075       |

|         |         |             |         |        |        |        |         |         |         |
|---------|---------|-------------|---------|--------|--------|--------|---------|---------|---------|
| ft03236 | slgA    | 0.088052903 | 0.665   | 0.838  | 0.607  | 2.482  | 1.573   | -2.648  | -1.669  |
| ft08590 | NijA    | 0.132144517 | 1.133   | 1.412  | 1.295  | 0.996  | 0.255   | -2.449  | -1.428  |
| ft06577 | CG6643  | 0.015425351 | 1.0485  | 0.5805 | 0.5215 | 0.3055 | 4.6665  | -3.7015 | -3.0795 |
| ft00555 | Corp    | 0.061488273 | 0.316   | 0.454  | -2.335 | 0.154  | -0.304  | -3.648  | -4.768  |
| fc18151 | sno     | 0.14575905  | 0.34    | 0.562  | 0.36   | -0.34  | 0.361   | -2.026  | -3.183  |
| fc16553 | scrib   | 0.116822275 | 3.1     | 3.511  | 3.423  | 3.467  | 2.839   | -2.645  | 1.088   |
| ft07689 | dup     | 0.128225639 | -1.037  | -0.415 | -0.59  | 0.237  | 0.119   | -2.849  | -3.739  |
| fc30028 | ERR     | 0.080795735 | 0.228   | 0.116  | 0.589  | 2.091  | 1.811   | -2.406  | -2.443  |
| fc13121 | CG30438 | 0.175254878 | 0.6115  | 0.3955 | 0.7245 | 0.2485 | 0.0155  | -1.8655 | -2.3595 |
| ft00803 | CG4386  | 0.010980197 | 3.395   | 3.286  | 3.638  | 5.109  | -1.415  | -2.375  | -3.263  |
| fc03597 | ppk6    | 0.083523396 | 1.805   | 2.543  | 1.854  | 0.307  |         | -1.306  | -3.013  |
| ft05356 | Mkk4    | 0.120219712 | 0.0025  | 0.4675 | 1.3625 | 0.6285 | -0.0025 | -1.8735 | -3.5105 |
| ft01398 | Atg2    | 0.113662268 | 0.501   | 0.52   | 0.712  | 2.06   | 0.517   | -2.162  | -2.088  |
| ft09402 | eIF-4B  | 0.022793262 | 1.214   | 1.209  | 0.787  | -2.554 | 2.646   | -4.331  | -3.902  |
| fc23410 | Cp1     | 0.086046054 | 0.726   | 0.942  | 1.143  |        | 2.851   | -1.413  | -2.877  |
| fc05896 | plexA   | 0.073567498 | 2.0955  | 2.2415 | 1.3015 | 2.4415 | 4.0575  | -0.7325 | -1.3755 |
| ft06750 | CG6490  | 0.116435078 | 0.7815  | 0.3775 | 1.0055 | 2.1325 | 1.3595  | -2.3315 | -1.4775 |
| ft01163 | gsb-n   | 0.024849994 | 2.443   | 2.113  | 4.316  | 0.474  | -0.138  | -2.829  | -2.497  |
| ft03114 | Cpr65Ec | 0.126890937 | 0.42    | 1.917  | 0.996  | 1.757  | 1.603   | -1.461  | -1.629  |
| ft08342 | CG30377 | 0.087536563 | 2.052   | 2.137  | 2.506  | 4.199  | 3.232   | -0.522  | -0.37   |
| ft06004 | Abd-B   | 0.060394391 | 0.492   | 1.667  | 0.042  | 2.587  | 2.708   | -2.06   | -2.331  |
| ft05165 | tadr    | 0.105343199 | -0.103  | -0.218 | -0.229 | -1.452 | -1.668  | -4.829  | -3.253  |
| fc12608 | Sin3A   | 0.149982369 | 0.4035  | 0.6005 | 0.5685 | 0.6585 | 1.4055  | -1.4455 | -2.7785 |
| ft03690 | CG5585  | 0.13938445  | 1.533   | 1.527  | 0.815  | 0.456  | 0.594   | -1.366  | -2.375  |
| fc21987 | CG32043 | 0.133108973 | 1.594   | 1.787  | 2.328  | 2.884  | 2.139   | -0.074  | -1.789  |
| ft06022 | m-cup   | 0.117019094 | -0.136  | 0.667  | 0.75   | 1.746  | 0.998   | -1.607  | -3.085  |
| ft01052 | enok    | 0.178197679 | 0.587   | 0.593  | 1.29   | 0.886  | 1.015   | -1.267  | -2.005  |
| ft08752 | CG33993 | 0.13001149  | 3.391   | 3.369  | 4.149  | 3.784  | 4.041   | -2.462  | 1.764   |
| fc32483 | CG12340 | 0.154940793 | 0.036   | -0.012 | 0.489  | 1.16   | 0.48    | -2.014  | -2.401  |
| ft03749 | CG7611  | 0.029581463 | 1.528   | 2.396  | 3.558  |        | -1.221  | -2.867  | -2.907  |
| fc04798 | dream   | 0.205512178 | -0.314  | 0.118  | -0.122 | 0.181  | 0.14    | -2.435  | -2.122  |
| fc29444 | kuk     | 0.083183766 | -0.1335 | 1.7765 | 2.3465 | 0.4105 | 1.4265  | -1.9255 | -2.4425 |
| fc18444 | CG32676 | 0.087946114 | 0.867   | 1.558  |        | 2.496  | -0.153  | -1.92   | -2.192  |
| fc20821 | CG40244 | 0.019653282 | -0.034  | 0.212  | 0.352  | 1.845  | 4.479   | -2.772  | -3.574  |
| fc12416 | topi    | 0.162256757 | 0.933   | 0.675  | 1.012  | 0.744  | -0.103  | -1.588  | -2.359  |
| ft04646 | CG6792  | 0.074455263 | 0.271   | -0.154 | 0.824  | 1.465  | -1.507  | -3.26   | -3.269  |
| fc03150 | CG40337 | 0.08327479  | 1.064   | 1.406  | 2.099  | 3.251  | 0.713   | -1.806  | -1.372  |
| fc11154 | CG33272 | 0.025079144 | 1.779   | 2.327  | 2.683  | 0.104  | 5.156   | -1.647  | -2.334  |

Table S2. Genotypes used in this study.

|                 | Panel           | Label                  | X-chromosome                                   | Chromosome II                                                                  | Chromosome III                                                             |
|-----------------|-----------------|------------------------|------------------------------------------------|--------------------------------------------------------------------------------|----------------------------------------------------------------------------|
| <b>Figure 1</b> | A               | wt                     | <i>w<sup>118</sup>, arm::GFP<sup>wee</sup></i> |                                                                                |                                                                            |
|                 | A               | <i>ban</i>             | <i>w<sup>118</sup>, arm::GFP<sup>wee</sup></i> |                                                                                | <i>ban<sup>1</sup>/ban<sup>1</sup></i>                                     |
|                 | D               | wt                     | <i>w<sup>118</sup></i>                         |                                                                                |                                                                            |
|                 | D               | <i>ban</i>             | <i>w<sup>118</sup></i>                         |                                                                                | <i>ban<sup>1</sup>/ban<sup>1</sup></i>                                     |
|                 | D               | <i>UAS-ban</i>         | <i>w<sup>118</sup></i>                         | <i>UAS-ban/+</i>                                                               | <i>A58-Gal4</i>                                                            |
|                 | E               | wt                     | <i>hs-flp<sup>122</sup></i>                    | <i>Act-Frt-Stop-Frt-Gal4, UAS-tdTomato/+</i>                                   |                                                                            |
| <b>Figure 2</b> | A-I, J, K       | wt                     | <i>w<sup>118</sup></i>                         |                                                                                |                                                                            |
|                 | I-K             | <i>ban</i>             | <i>w<sup>118</sup></i>                         |                                                                                | <i>ban<sup>1</sup>/ban<sup>1</sup></i>                                     |
|                 | J, K            | <i>dup</i>             | <i>w<sup>118</sup></i>                         | <i>dup<sup>k03308</sup>/dup<sup>k03308</sup></i>                               |                                                                            |
|                 | J, K            | <i>rap</i>             | <i>w<sup>118</sup>, rap<sup>G0418</sup></i>    |                                                                                |                                                                            |
|                 | J, K            | <i>UAS-ban</i>         | <i>w<sup>118</sup></i>                         | <i>UAS-ban/+</i>                                                               | <i>A58-Gal4/+</i>                                                          |
|                 | J, K            | <i>UAS-dm</i>          | <i>w<sup>118</sup></i>                         | <i>UAS-dm/+</i>                                                                | <i>A58-Gal4/+</i>                                                          |
| <b>Figure 3</b> | A, G, H-J       | wt                     | <i>w<sup>118</sup>, ppk-3x-mCD8-GFP</i>        |                                                                                |                                                                            |
|                 | B, G            | <i>ban</i>             | <i>w<sup>118</sup>, ppk-3x-mCD8-GFP</i>        |                                                                                |                                                                            |
|                 | C, G            | <i>dup</i>             | <i>w<sup>118</sup>, ppk-3x-mCD8-GFP</i>        |                                                                                |                                                                            |
|                 | D, G            | <i>UAS-CycE</i>        | <i>w<sup>118</sup>, ppk-3x-mCD8-GFP</i>        | <i>UAS-CycE/+</i>                                                              | <i>A58-Gal4/+</i>                                                          |
|                 | E, G            | <i>UAS-ban</i>         | <i>w<sup>118</sup>, ppk-3x-mCD8-GFP</i>        | <i>UAS-ban/+</i>                                                               | <i>A58-Gal4/+</i>                                                          |
|                 | F, G            | <i>UAS-dm</i>          | <i>w<sup>118</sup>, ppk-3x-mCD8-GFP</i>        | <i>UAS-dm/+</i>                                                                | <i>A58-Gal4/+</i>                                                          |
|                 | G               | <i>rap</i>             | <i>w<sup>118</sup>, rap<sup>G0418</sup></i>    |                                                                                | <i>ppk-EGFP/ppk-EGFP</i>                                                   |
|                 | H               | <i>ban/dup</i>         | <i>w<sup>118</sup>, ppk-3x-mCD8-GFP</i>        | <i>dup<sup>k03308</sup>/+</i>                                                  | <i>ban<sup>1</sup>/+</i>                                                   |
|                 | I               | <i>dup +UAS-ban</i>    |                                                | <i>dup<sup>k03308</sup>, UAS-ban/ dup<sup>k03308</sup></i>                     | <i>A58-Gal4, ppk-CD4-tdTomato/ppk-CD4-tdTomato</i>                         |
|                 | J-K             | <i>ban + UAS-dm</i>    | <i>w<sup>118</sup>, ppk-3x-mCD8-GFP</i>        | <i>UAS-dm/+</i>                                                                | <i>ban<sup>1</sup>, A58-Gal4/ ban<sup>1</sup></i>                          |
| <b>Figure 4</b> | A, C, H, F, G   | wt                     | <i>w<sup>118</sup></i>                         | <i>Ppk-CD4-tdTomato-T2A-sp11GFP/+</i>                                          | <i>A58-Gal4/UAS-sp1-10GFP</i>                                              |
|                 | D, F, G, I      | <i>UAS-ban</i>         | <i>w<sup>118</sup></i>                         | <i>Ppk-CD4-tdTomato-T2A-sp11GFP/UAS-ban</i>                                    | <i>A58-Gal4/UAS-sp1-10GFP</i>                                              |
|                 | E-G             | <i>dup</i>             | <i>w<sup>118</sup></i>                         | <i>Ppk-CD4-tdTomato-T2A-sp11GFP, dup<sup>k03308</sup>/dup<sup>k03308</sup></i> | <i>A58-Gal4/UAS-sp1-10GFP</i>                                              |
| <b>Figure 5</b> | A, B, G, H      | wt                     | <i>w<sup>118</sup></i>                         | <i>vkG<sup>G205</sup>(vkG::GFP)/+</i>                                          | <i>ppk-CD4-tdTomato/ppk-CD4-tdTomato</i>                                   |
|                 | C, G, H         | <i>ban</i>             | <i>w<sup>118</sup></i>                         | <i>vkG<sup>G205</sup>/+</i>                                                    | <i>ban<sup>1</sup>, ppk-CD4-tdTomato/ban<sup>1</sup>, ppk-CD4-tdTomato</i> |
|                 | D, G, H         | <i>UAS-ban</i>         | <i>w<sup>118</sup></i>                         | <i>vkG<sup>G205</sup>/UAS-ban</i>                                              | <i>A58-Gal4, ppk-CD4-tdTomato/ppk-CD4-tdTomato</i>                         |
|                 | E, G, H         | <i>dup</i>             | <i>w<sup>118</sup></i>                         | <i>vkG<sup>G205</sup>, dup<sup>k03308</sup>/dup<sup>k03308</sup></i>           | <i>ppk-CD4-tdTomato/ppk-CD4-tdTomato</i>                                   |
|                 | F-H             | <i>UAS-dm</i>          | <i>w<sup>118</sup></i>                         | <i>vkG<sup>G205</sup>/UAS-dm</i>                                               | <i>A58-Gal4, ppk-CD4-tdTomato/ppk-CD4-tdTomato</i>                         |
| <b>Figure 6</b> | A               | wt                     | <i>w<sup>118</sup>, arm::GFP<sup>wee</sup></i> |                                                                                |                                                                            |
|                 | A               | <i>ban</i>             | <i>w<sup>118</sup>, arm::GFP<sup>wee</sup></i> |                                                                                | <i>ban<sup>1</sup>/ban<sup>1</sup></i>                                     |
|                 | B               | wt                     | <i>w<sup>118</sup></i>                         |                                                                                |                                                                            |
|                 | B               | <i>ban</i>             | <i>w<sup>118</sup></i>                         |                                                                                | <i>ban<sup>1</sup>/ban<sup>1</sup></i>                                     |
|                 | B               | <i>dup</i>             | <i>w<sup>118</sup></i>                         | <i>dup<sup>k03308</sup>/dup<sup>k03308</sup></i>                               |                                                                            |
|                 | B               | <i>rap</i>             | <i>w<sup>118</sup>, rap<sup>G0418</sup></i>    |                                                                                |                                                                            |
| B               | <i>UAS-CycE</i> | <i>w<sup>118</sup></i> | <i>UAS-CyclinE</i>                             | <i>A58-Gal4/+</i>                                                              |                                                                            |

|                  |     |                            |                                                            |                                                                                |                                                                            |
|------------------|-----|----------------------------|------------------------------------------------------------|--------------------------------------------------------------------------------|----------------------------------------------------------------------------|
|                  | B   | <i>UAS-ban</i>             | <i>w<sup>118</sup></i>                                     | <i>UAS-ban/+</i>                                                               | <i>A58-Gal4/+</i>                                                          |
|                  | B   | <i>UAS-dm</i>              | <i>w<sup>118</sup></i>                                     | <i>UAS-dm/+</i>                                                                | <i>A58-Gal4/+</i>                                                          |
|                  | C   | wt                         | <i>w<sup>118</sup>, ppk-3x-mCD8-GFP</i>                    |                                                                                |                                                                            |
|                  | D   | <i>UAS-mysRNAi</i>         | <i>w<sup>118</sup>, ppk-3x-mCD8-GFP</i>                    |                                                                                | <i>UAS-mysRNAi<sup>HMS00043</sup>/A58-Gal4</i>                             |
|                  | E   | <i>UAS-ban + mysRNAi</i>   | <i>w<sup>118</sup>, ppk-3x-mCD8-GFP</i>                    | <i>UAS-ban</i>                                                                 | <i>UAS-mysRNAi<sup>HMS00043</sup>/A58-Gal4</i>                             |
|                  | F   | <i>UAS-Integrins</i>       | <i>w<sup>118</sup>, ppk-3x-mCD8-GFP</i>                    |                                                                                | <i>UAS-mys, UAS-mew</i>                                                    |
|                  | G   | <i>ban + UAS-Integrins</i> | <i>w<sup>118</sup>, ppk-3x-mCD8-GFP</i>                    |                                                                                | <i>ban<sup>1</sup>, UAS-mys, UAS-mew/ A58-Gal4, ban<sup>1</sup></i>        |
| <b>Figure 7</b>  | A-D | wt                         | <i>w<sup>118</sup></i>                                     | <i>ppk-CD4-tdTomato-T2A-sp11GFP/+</i>                                          | <i>A58-Gal4/UAS-sp1-10GFP</i>                                              |
|                  | E   | wt                         | <i>w<sup>118</sup>, ppk-3x-mCD8-GFP</i>                    |                                                                                |                                                                            |
|                  | F   | <i>dup</i>                 | <i>w<sup>118</sup>, ppk-3x-mCD8-GFP</i>                    | <i>dup<sup>k03308</sup>/dup<sup>k03308</sup></i>                               |                                                                            |
|                  | G   | <i>vkg</i>                 | <i>w<sup>118</sup>, ppk-3x-mCD8-GFP</i>                    | <i>vkg<sup>01209</sup>, cn<sup>1</sup>/vkg<sup>01209</sup>, cn<sup>1</sup></i> |                                                                            |
|                  | H   | <i>mysRNAi</i>             | <i>w<sup>118</sup>, ppk-3x-mCD8-GFP</i>                    |                                                                                | <i>UAS-mysRNAi<sup>HMS00043</sup>/A58-Gal4</i>                             |
| <b>Figure S1</b> |     | wt                         | <i>w<sup>118</sup></i>                                     |                                                                                |                                                                            |
|                  |     | <i>ban</i>                 | <i>w<sup>118</sup></i>                                     |                                                                                | <i>ban<sup>1</sup>/ban<sup>1</sup></i>                                     |
|                  |     | <i>UAS-ban</i>             | <i>w<sup>118</sup></i>                                     | <i>UAS-ban/+</i>                                                               | <i>A58-Gal4/+</i>                                                          |
| <b>Figure S2</b> |     | wt                         | <i>w<sup>118</sup></i>                                     | <i>ppk-CD4-tdTomato-T2A-sp11GFP/+</i>                                          | <i>ppk-Gal4/UAS-sp1-10GFP</i>                                              |
| <b>Figure S3</b> | A   | wt                         | <i>w<sup>118</sup>, trof<sup>ec11700</sup> (trol::GFP)</i> |                                                                                | <i>ppk-CD4-tdTomato/ppk-CD4-tdTomato</i>                                   |
|                  | B   | <i>ban</i>                 | <i>w<sup>118</sup>, trof<sup>ec11700</sup></i>             |                                                                                | <i>ban<sup>1</sup>, ppk-CD4-tdTomato/ban<sup>1</sup>, ppk-CD4-tdTomato</i> |
|                  | C   | <i>UAS-ban</i>             | <i>w<sup>118</sup>, trof<sup>ec11700</sup></i>             | <i>UAS-ban/+</i>                                                               | <i>A58-Gal4, ppk-CD4-tdTomato/ppk-CD4-tdTomato</i>                         |
|                  | D   | <i>UAS-dm</i>              | <i>w<sup>118</sup></i>                                     | <i>UAS-dm/+</i>                                                                | <i>A58-Gal4/+</i>                                                          |
| <b>Figure S4</b> |     | wt                         | <i>w<sup>118</sup></i>                                     | <i>vkg<sup>G205</sup>(vkg::GFP)/+</i>                                          | <i>ppk-CD4-tdTomato/ppk-CD4-tdTomato</i>                                   |
| <b>Figure S5</b> | A   | wt                         | <i>w<sup>118</sup></i>                                     |                                                                                |                                                                            |
|                  | B   | <i>ban</i>                 | <i>w<sup>118</sup></i>                                     |                                                                                | <i>ban<sup>1</sup>/ban<sup>1</sup></i>                                     |
|                  | C   | <i>UAS-ban</i>             | <i>w<sup>118</sup></i>                                     | <i>UAS-ban/+</i>                                                               | <i>A58-Gal4/+</i>                                                          |
|                  | E   | <i>dup</i>                 | <i>w<sup>118</sup></i>                                     | <i>dup<sup>k03308</sup>/dup<sup>k03308</sup></i>                               |                                                                            |
|                  | E   | <i>UAS-dm</i>              | <i>w<sup>118</sup></i>                                     | <i>UAS-dm/+</i>                                                                | <i>A58-Gal4/+</i>                                                          |
| <b>Figure S6</b> | A   | wt                         | <i>w<sup>118</sup></i>                                     |                                                                                |                                                                            |
|                  | B   | <i>ban</i>                 | <i>w<sup>118</sup></i>                                     |                                                                                | <i>ban<sup>1</sup>/ban<sup>1</sup></i>                                     |
|                  | C   | <i>UAS-ban</i>             | <i>w<sup>118</sup></i>                                     | <i>UAS-ban/+</i>                                                               | <i>A58-Gal4/+</i>                                                          |
|                  | D   | <i>UAS-dm</i>              | <i>w<sup>118</sup></i>                                     | <i>UAS-dm/+</i>                                                                | <i>A58-Gal4/+</i>                                                          |
| <b>Figure S7</b> | E   | wt                         | <i>w<sup>118</sup>, ppk-3x-mCD8-GFP</i>                    |                                                                                |                                                                            |
|                  | F   | <i>UAS-mysRNAi</i>         | <i>w<sup>118</sup>, ppk-3x-mCD8-GFP</i>                    |                                                                                | <i>UAS-mysRNAi<sup>HMS00043</sup>/A58-Gal4</i>                             |

## **Supplemental Materials and Methods**

### **Dendrite measurements**

To measure dendrite coverage, we used three indices. The coverage index represents the portion of the larval body wall covered by dendrites of a single neuron in dorsal hemisegments bounded by muscle attachment sites (apodemes; anterior/posterior boundaries), the dorsal midline (dorsal boundary) and a line connecting a neuron of interest to the corresponding neuron in the adjacent segments (ventral boundary). A dendrite that completely covers the dorsal hemisegment would have a coverage index of 1 whereas a dendrite that covered the entire dorsal hemisegment and territory of neighboring hemisegments would have a coverage index of  $> 1$ . The Invasion Index represents the portion of a dorsal hemisegment that is covered by dendrites of neurons from neighboring hemisegments. Midline occupancy represents the dendrite density at the midline and is expressed as dendrite length/unit area ( $\mu\text{m}$  dendrite length/ $1000\mu\text{m}^2$ ).

### **Fluorescence-activated cell sorting (FACS)**

Larvae were filleted in PBS and the tissue containing cells of interest was dissected away from all other tissues. Dissection time was limited to 30min per sample, and following dissection cell suspensions were prepared in 5 volumes of PBS/2x trypsin via 3 cycles of the following: triturate 10x through a 1000 microliter pipet tip, mix 5min at 1000 rpm in a 37°C microtube mixer. Cell suspensions were filtered through a 70um cell strainer and sorted on a FACSAria II (BD). GFP<sup>+</sup> non-autofluorescent events were sorted into RNAqueous-Micro Lysis buffer (Life Tech.) and frozen on dry ice.

### **RNA isolation, amplification, and microarray hybridization**

RNA was isolated from FACS-sorted samples using an RNAqueous-Micro kit (Life Tech.) and DNase-treated. All RNA samples were subjected to two rounds of linear amplification using the Aminoallyl MessageAmp II kit (Life Tech.). Dye-coupled aRNA was fragmented and hybridized to custom-designed microarrays (Agilent).

### **Microarray design**

We hybridized our samples to custom-designed 4x44k feature oligonucleotide microarrays (Agilent, Santa Clara, CA). We designed two 60-mer oligonucleotide probes for each of the 20,726 coding sequences in the annotated fly genome (release 5.2) using ArrayOligoSelector (Bozdech et al., 2003), resulting in 35,272 successful probe designs, 16,717 additional probes against alternatively spliced transcripts, and 546 probes targeting non-coding RNA (244 snoRNA, 108 tRNA, 24 snRNA, 74 rRNA, 3 miRNA, 93 other). The final probe set was filtered to remove redundant probes, overlapping probes, and those with cross hybridization potential (based on a -21.6 kcal/mol threshold, which was chosen to fit the number of probes allowed in the Agilent 4 x 44k design specification). This resulted in 33,792 probes to CDS, 8744 probes to alternatively spliced transcripts, and 546 RNA probes. In total, 43,803 probes were included in the design.

### **Microarray scanning, feature extraction, normalization, and filtering**

Microarrays were scanned on an Axon 4000B scanner and feature information extracted in GenePix 6 (Molecular Devices). GPR files were uploaded into Acuity (Molecular Devices) and ratio normalized. Data was retrieved using quality filters for reference

channel intensity, background intensity, pixel saturation, pixel variance, feature diameter, % pixel intensity over background, and feature circularity. “Ratio of Medians” data was further filtered for 70% present data, Cy5 net median intensity > 350 across a minimum of 3 arrays, Cy3 net median intensity > 150 across a minimum of 20 arrays. Expression ratios were log<sub>2</sub> transformed, arrays median centered, quantile normalized, and genes median centered before analysis.

## References

**Bozdech, Z., Zhu, J., Joachimiak, M. P., Cohen, F. E., Pulliam, B. and DeRisi, J. L.** (2003). Expression profiling of the schizont and trophozoite stages of *Plasmodium falciparum* with a long-oligonucleotide microarray. *Genome Biol.* **4**, R9.
